# Supplementary material
Source: publisher figshare collection journal article supplement (https://acs.figshare.com/ndownloader/files/4314766)

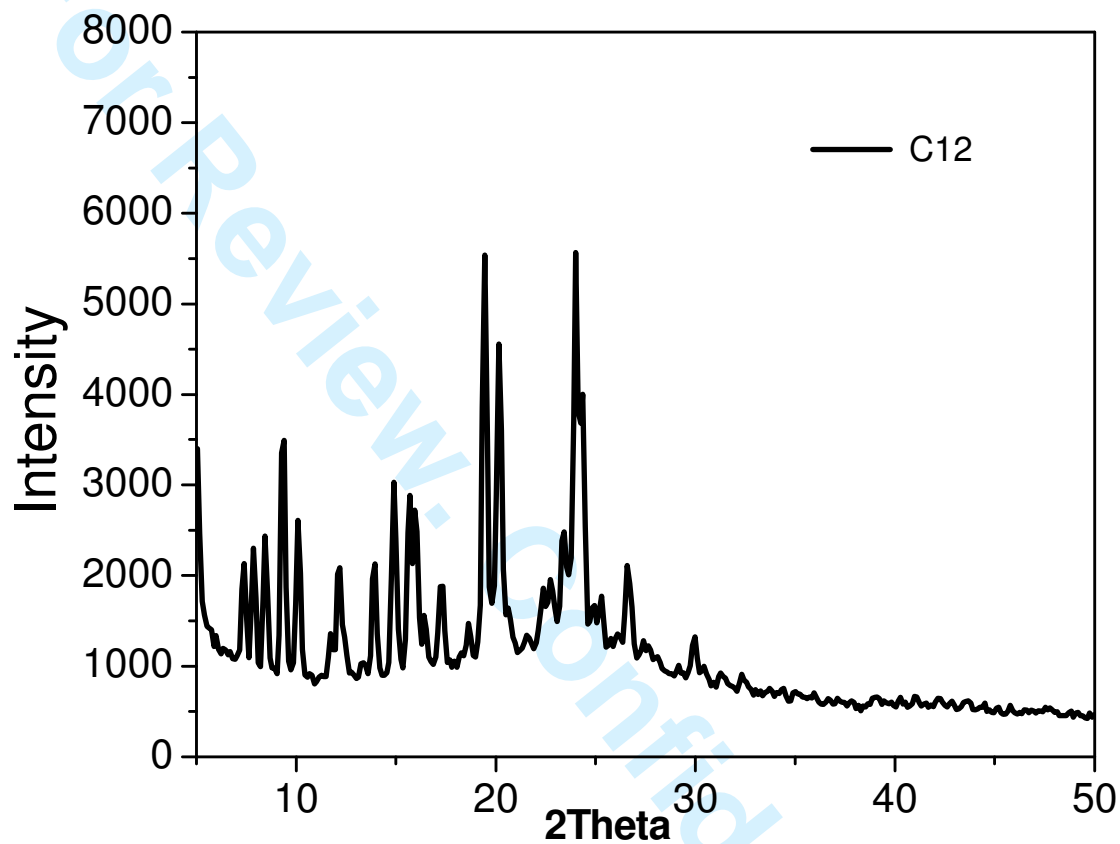

Figure S1: Powder X-ray diffraction pattern of compound C12

Supplement: Supplementary file 1 [file 4314766]
